# Supplementary material for: Innate Sensing through Mesenchymal TLR4/MyD88 Signals Promotes Spontaneous Intestinal Tumorigenesis
Source: PubMed Central journal article supplement — Cell Rep. 2019 Jan 15;26(3):536–545.e4. doi: 10.1016/j.celrep.2018.12.072 (PMC6334226; doi:10.1016/j.celrep.2018.12.072), 2019-01-15
Supplement: mmc1.pdf [file mmc1.pdf]

**Cell Reports, Volume 26**

**Supplemental Information**

**Innate Sensing through Mesenchymal**

**TLR4/MyD88 Signals Promotes**

**Spontaneous Intestinal Tumorigenesis**

**Vasiliki Koliaraki, Niki Chalkidi, Ana Henriques, Christos Tzaferis, Apostolos Polykratis, Ari Waisman, Werner Muller, David J. Hackam, Manolis Pasparakis, and George Kollias**

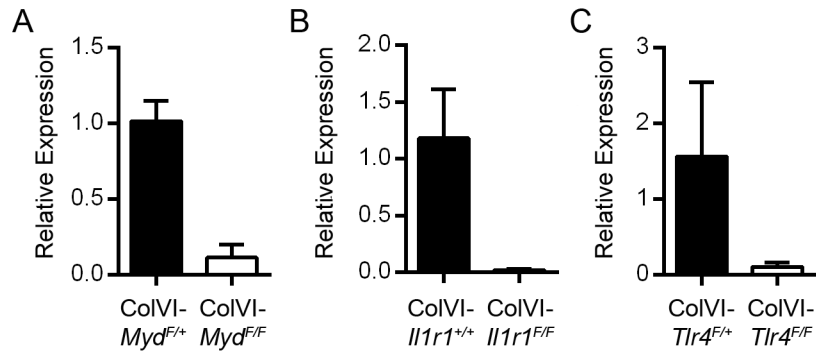

**Figure S1. Deletion efficiency of *Myd88*, *Il1r1* and *Tlr4*.** Related to Figures 1 and 3. qRT-PCR analysis of isolated GFP<sup>+</sup> cells from (A) ColVIcre-*Myd88*<sup>F/+</sup>-mTmG and ColVIcre-*Myd88*<sup>F/F</sup>-mTmG, (B) ColVIcre-*Tlr4*<sup>F/+</sup>-mTmG and ColVIcre-*Tlr4*<sup>F/F</sup>-mTmG and (C) ColVIcre-*Il1r1*<sup>+/+</sup>-mTmG and ColVIcre-*Tlr4*<sup>F/F</sup>-mTmG. B2m was used for normalization (n=3).

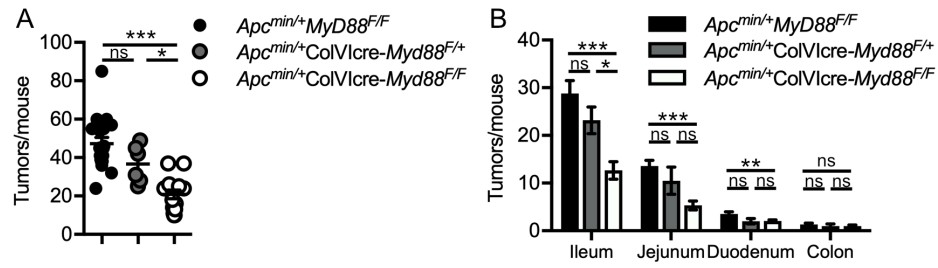

**Figure S2. Cre in the *Apc<sup>min/+</sup>-Myd88<sup>IMCko</sup>* does not affect tumor development. Related to Figure 1.**  
 (A) Total number of tumors per mouse and (B) number of tumors per intestinal part in 4-month old *Apc<sup>min/+</sup>ColV1cre-Myd88<sup>F/F</sup>* (n=15), *Apc<sup>min/+</sup>ColV1cre-Myd88<sup>F/+</sup>* (n=6) mice and their littermate controls (n=18). Data represent mean  $\pm$  SEM. \*p<0.05, \*\*p<0.01, \*\*\*p<0.001, ns = not significant.

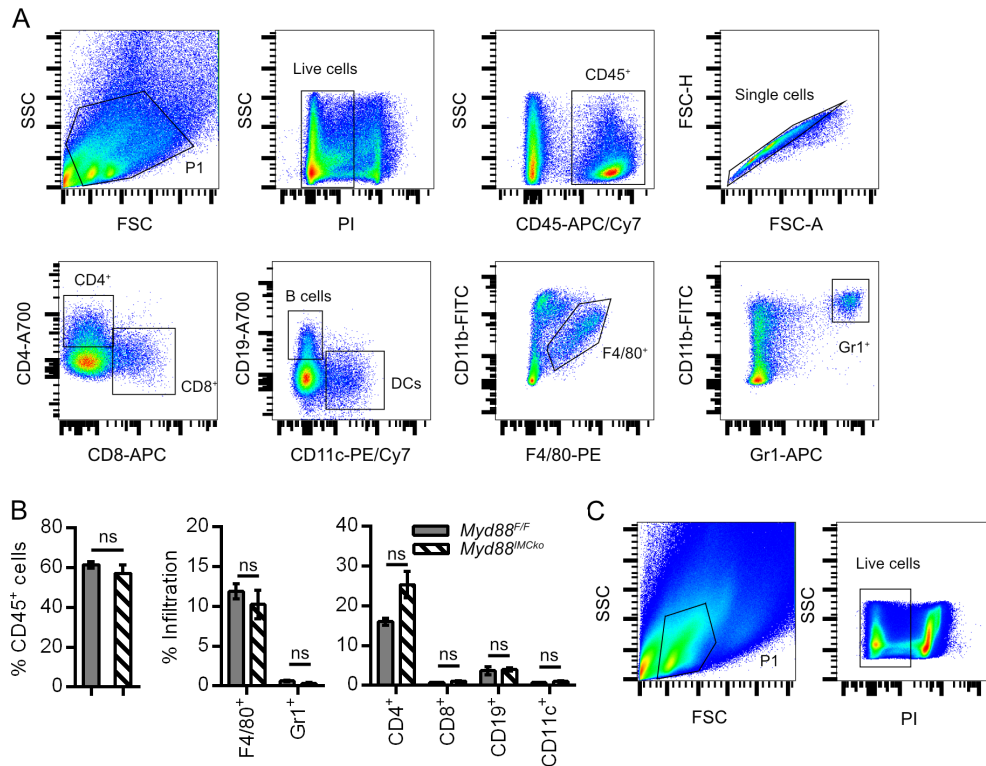

**Figure S3. FACS gating strategies. Related to Figure 2.** (A) FACS gating strategy for measuring inflammatory cell infiltration in the small intestine and tumors. The cell suspension was gated for live CD45<sup>+</sup>. In this CD45<sup>+</sup> population, we plotted CD4 and CD8, for measuring the respective T cell populations, CD19 and CD11c for B and dendritic cell and CD11b with F4/80 and Gr1 to identify double positive CD11b<sup>+</sup>F4/80<sup>+</sup> and CD11b<sup>+</sup>Gr1<sup>+</sup> cells. (B) Infiltration of CD45<sup>+</sup> cells, CD11b<sup>+</sup>F4/80<sup>+</sup> macrophages, CD11b<sup>+</sup>Gr1<sup>+</sup> neutrophils, CD4<sup>+</sup> T cells, CD8<sup>+</sup> T cells, CD19<sup>+</sup> B cells and CD11c<sup>+</sup> dendritic cells in intestinal tissue from *Myd88<sup>F/F</sup>* and *Myd88<sup>IMCko</sup>* mice or 3-month old *Apc<sup>min/+</sup>Myd88<sup>F/F</sup>* and *Apc<sup>min/+</sup>Myd88<sup>IMCko</sup>* mice (n=4-5), quantified by FACS analysis. Data represent mean ± SEM. ns = not significant. (C) Gating strategy for Figure 2H. Single-cell suspensions from tumors were gated for live cells using Propidium Iodide (PI) (n=3 mice).

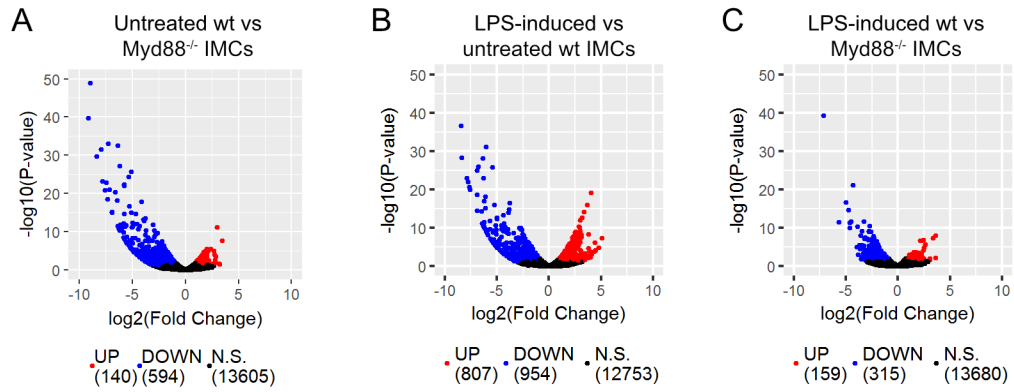

**Figure S4. Comparisons between samples used for RNA sequencing. Related to Figure 4.** (A) Volcano plot of deregulated genes between untreated wt and MyD88<sup>-/-</sup> IMCs. (B) Volcano plot of deregulated genes between untreated and LPS-treated wt IMCs. (C) Volcano plot of deregulated genes between LPS-treated wt and MyD88<sup>-/-</sup> IMCs. Not significant genes are depicted with black color (N.S), significant up regulated genes (p-value < 0.05, log<sub>2</sub>FC > 1) with red and significant down regulated genes (p-value < 0.05, log<sub>2</sub>FC < -1) with blue.

**Table S1. List of primers for qRT-PCR. Related to STAR Methods.**

| Gene          | Primer (5'-3')                                           | Size (bp) | Anneal. Tem. | Reference              |
|---------------|----------------------------------------------------------|-----------|--------------|------------------------|
| <i>Ptgs2</i>  | F: TGAGCACAGGATTTGACCAG<br>R: CCTTGAAGTGGGTCAGGATG       | 150       | 58           | (Salcedo et al., 2010) |
| <i>Il6</i>    | F: GTTCTCTGGGAAATCGTGGA<br>R: TCCAGTTTGGTAGCATCCATC      | 138       | 59           | (Salcedo et al., 2010) |
| <i>Il11</i>   | F: AACTGTGTTTGTGCGCCTGGT<br>R: CGTCAGCTGGGAATTTGTCT      | 199       | 59           | (Salcedo et al., 2010) |
| <i>Cd44</i>   | F: TTATCCGGAGCACCTTGGCCAC<br>R: TGCACCTCGTTGTGGGCTCCTGAG | 143       | 59           |                        |
| <i>Tnf</i>    | F: CACGCTCTTCTGTCTACTGA<br>R: ATCTGAGTGTGAGGGTCTGG       | 110       | 55           |                        |
| <i>Mmp7</i>   | F: GCTGCCACCCATGAATTTGGCC<br>R: GGACCCAGTGAGTGCAGACCG    | 209       | 59           |                        |
| <i>Cxcl1</i>  | F: CGCACGTGTTGACGCTTCCC<br>R: TCCCAGAGCGAGACGAGACCA      | 105       | 59           |                        |
| <i>Igf1</i>   | F: GGGAGATGCAAAGGCCTCCCC<br>R: ACCAGGACTCCCAAATCCCTAGCC  | 142       | 56           |                        |
| <i>Igfbp5</i> | F: ACGGCGAGCAAACCAAGATA<br>R: GAGGGCTTACACTGCTTTCT       | 382       | 55           | (Ding et al., 2016)    |
| <i>Mmp10</i>  | F: CACAAGCCCAGCTAACTTCC<br>R: TTTGTCTGGGGTCTCAGGTC       | 136       | 59           | (Salcedo et al., 2010) |
| <i>Myd88</i>  | F: CTAGGACAAACGCCGGA<br>R: ATTAGCTCGCTGGCAATGGA          | 176       | 60           |                        |
| <i>Tlr4</i>   | F: TTCAGAACTTCAGTGGCTGGAT<br>R: GTCTCCACAGCCACCAGATT     | 177       | 58           |                        |
| <i>Il1r1</i>  | F: ACAACGTGAGCTTCTTCGGA<br>R: GCTTCCCCCGGAACGTATAG       | 108       | 60           |                        |
| <i>B2m</i>    | F: TTCTGGTGCTTGTCTCACTGA<br>R: CAGTATGTTTCGGCTTCCCATT    | 104       | 58           |                        |
| <i>Hprt</i>   | F: TGCCGAGGATTTGGAAAAAGTG<br>R: CACAGAGGGCCACAATGTGATG   | 116       | 55           |                        |
